# Supplementary material for: The horse as a natural model to study reproductive aging-induced aneuploidy and weakened centromeric cohesion in oocytes
Source: publisher site journal article supplement (doi:10.18632/aging.104159), 2020-11-02
Supplement: Supplementary file [file aging-v12i21-104159-supplementary-material-SD1.pdf]

SUPPLEMENTARY FIGURE

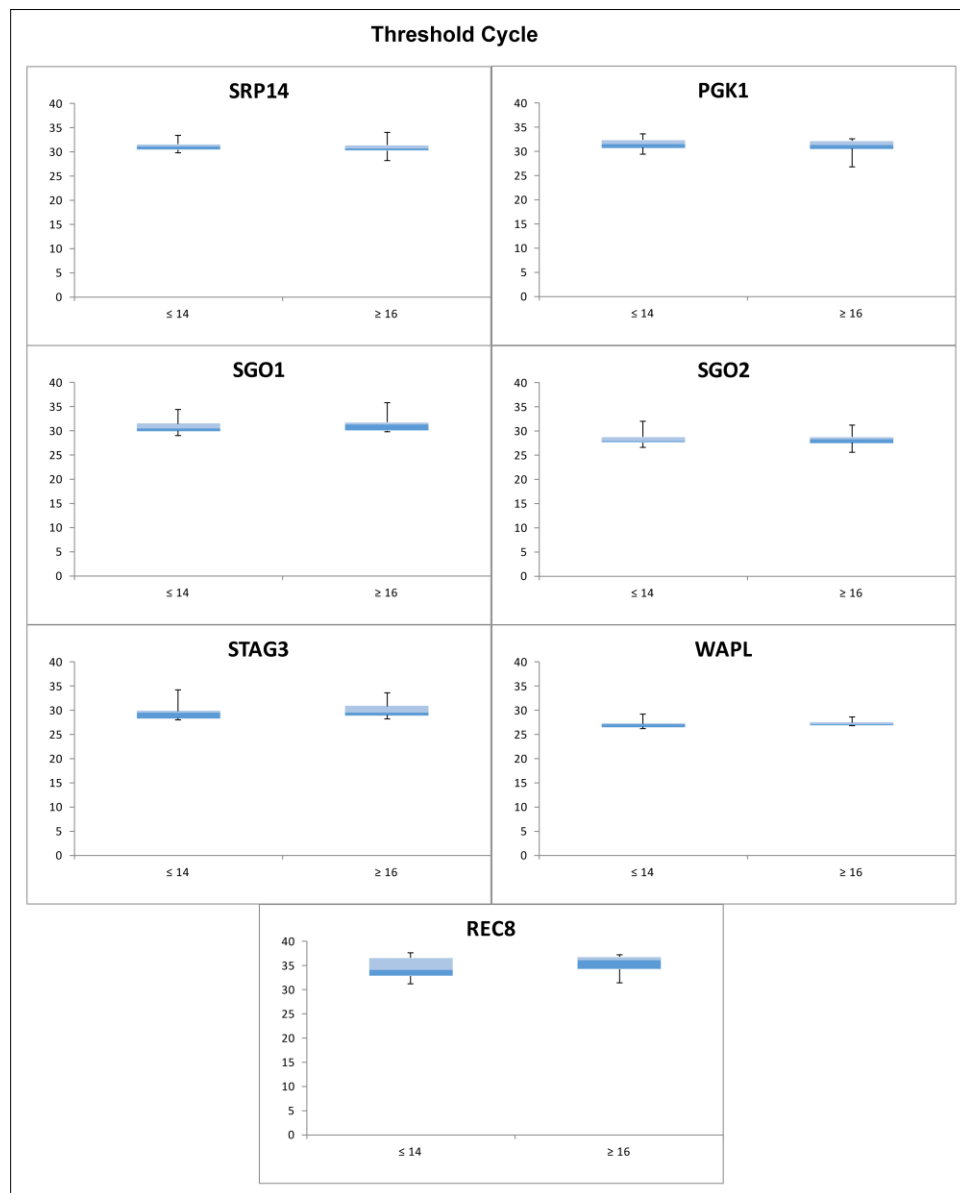

Supplementary Figure 1. Box Plot showing cycle threshold (Ct) values for all genes studied.
